# Supplementary material for: Author Correction: Bromodomain protein Brd3 promotes Ifnb1 transcription via enhancing IRF3/p300 complex formation and recruitment to Ifnb1 promoter in macrophages
Source: PubMed Central journal article supplement (PMC7708833; doi:10.1038/s41598-020-77134-7), 2020-12-01

**Bromodomain protein Brd3 promotes *Ifnb1* transcription via enhancing IRF3/p300 complex formation and recruitment to *Ifnb1* promoter in macrophages**

Wenhui Ren<sup>1\*</sup>, Chunmei Wang<sup>2\*</sup>, Qinlan Wang<sup>3\*</sup>, Dezhi Zhao<sup>3</sup>, Kai Zhao<sup>2</sup>, Donghao Sun<sup>2</sup>, Xingguang Liu<sup>1</sup>, Chaofeng Han<sup>1</sup>, Jin Hou<sup>1</sup>, Xia Li<sup>2</sup>, Qian Zhang<sup>1</sup>, Xuetao Cao<sup>1,2</sup> & Nan Li<sup>1</sup>

<sup>1</sup>National Key Laboratory of Medical Immunology and Institute of Immunology, Second Military Medical University, Shanghai 200433

<sup>2</sup>Institute of Basic Medical Sciences, Chinese Academy of Medical Sciences, School of Basic Medicine Peking Union Medical College, Beijing 100005

<sup>3</sup>Institute of Immunology, Zhejiang University School of Medicine, Hangzhou 310058, Zhejiang, China

\*These authors contributed equally to this work.

Correspondence and requests for materials should be addressed to N.L.(email: [linan@immunol.org](mailto:linan@immunol.org))

# Uncropped data for Figure 1

Figure 1a

*Brd3*

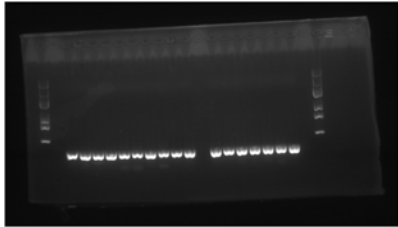

*Actb*

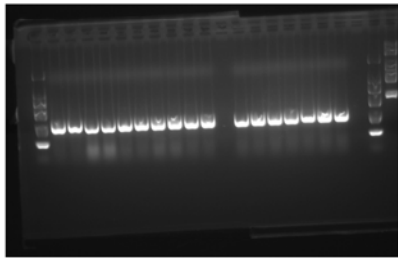

Figure 1c

HSV

*Brd3*

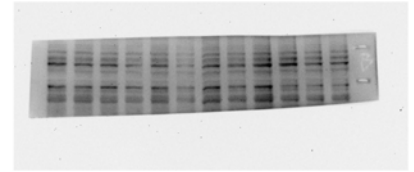

Actin

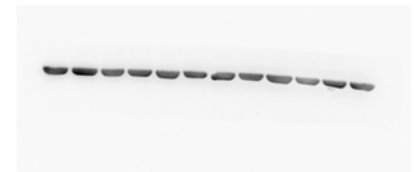

VSV

*Brd3*

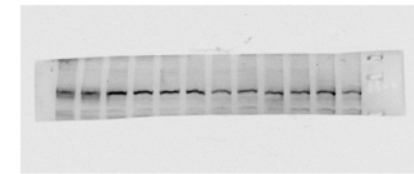

# Uncropped data for Figure 3

Figure 3a

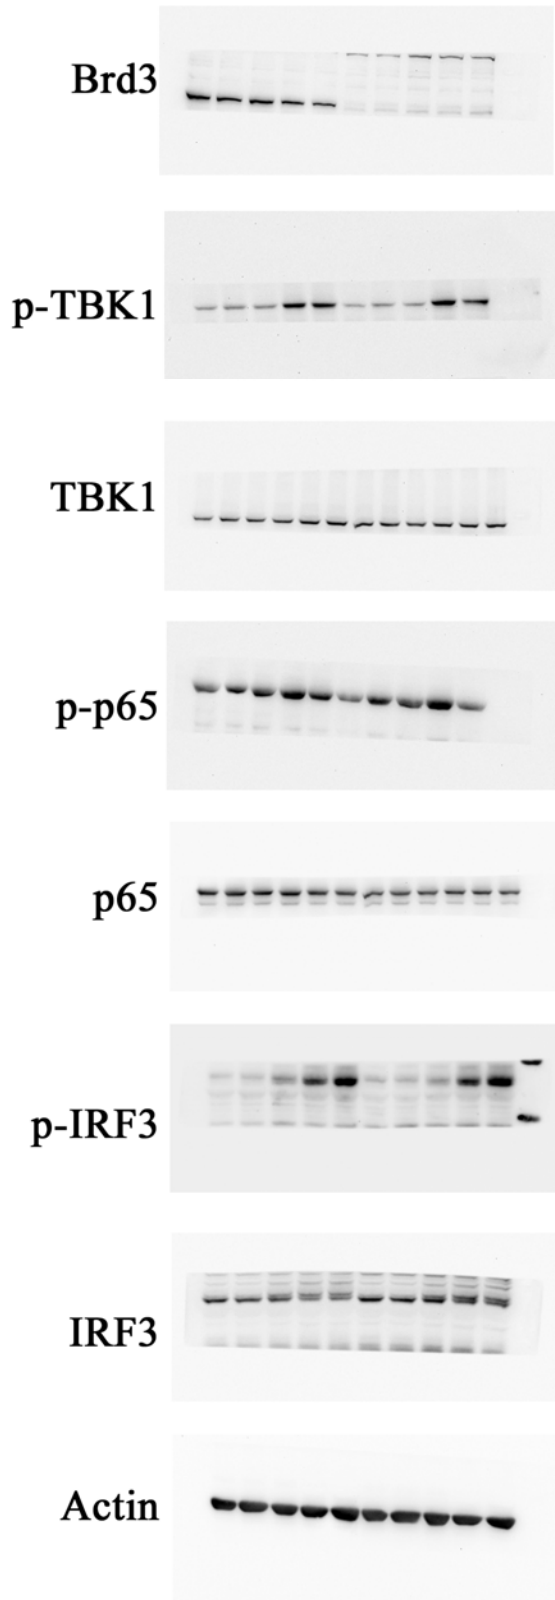

Figure 3b

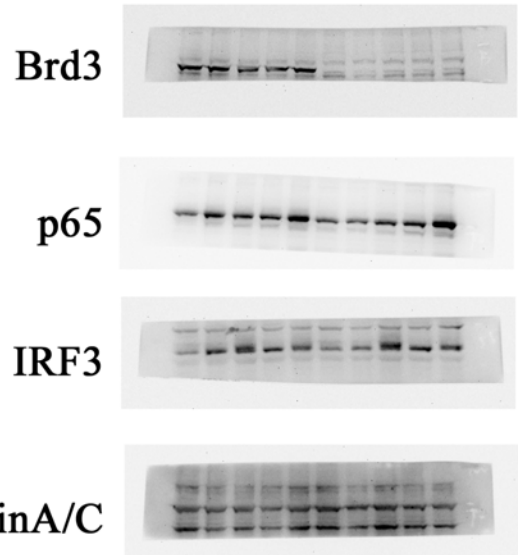

Figure 3c

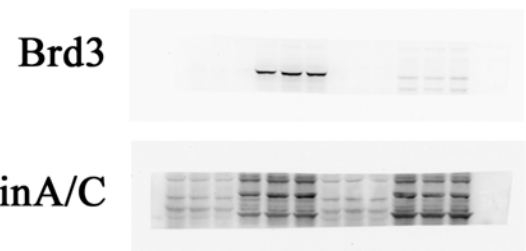

Figure 3d

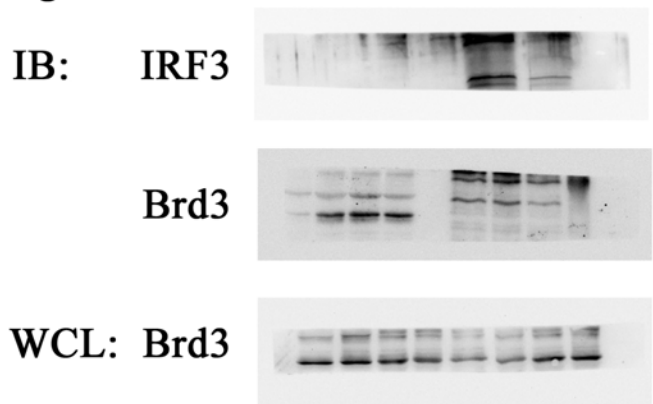

# Uncropped data for Figure 4

Figure 4a

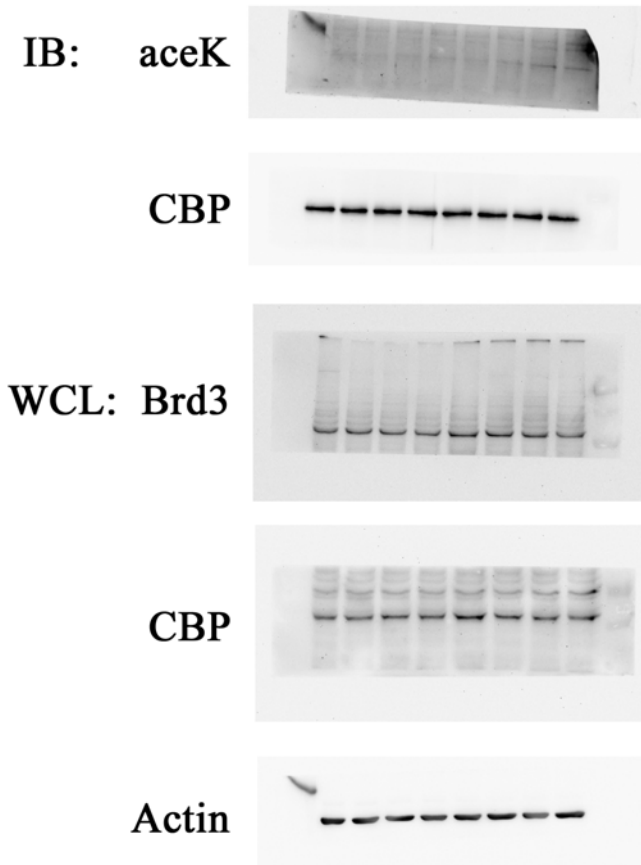

Figure 4b

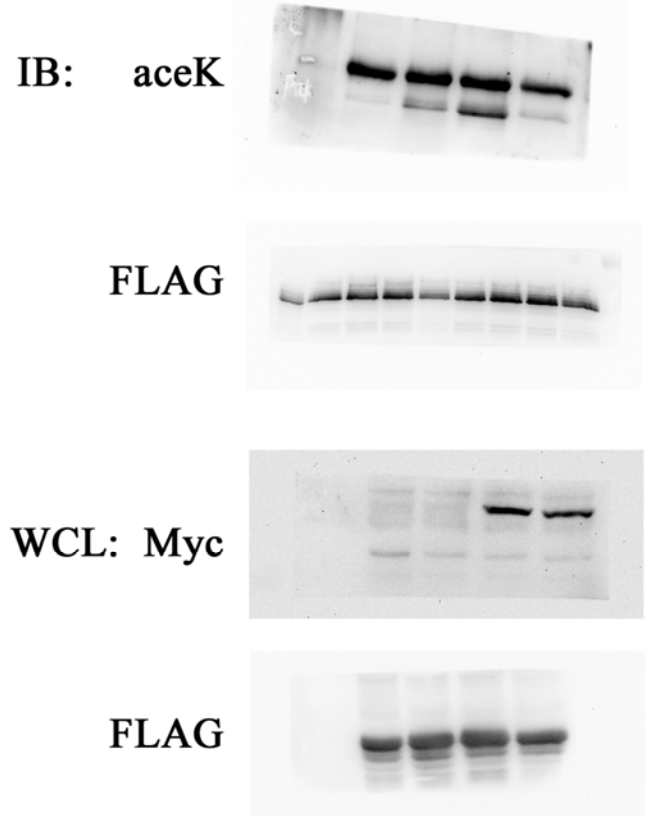

# Uncropped data for Figure 5

Figure 5a

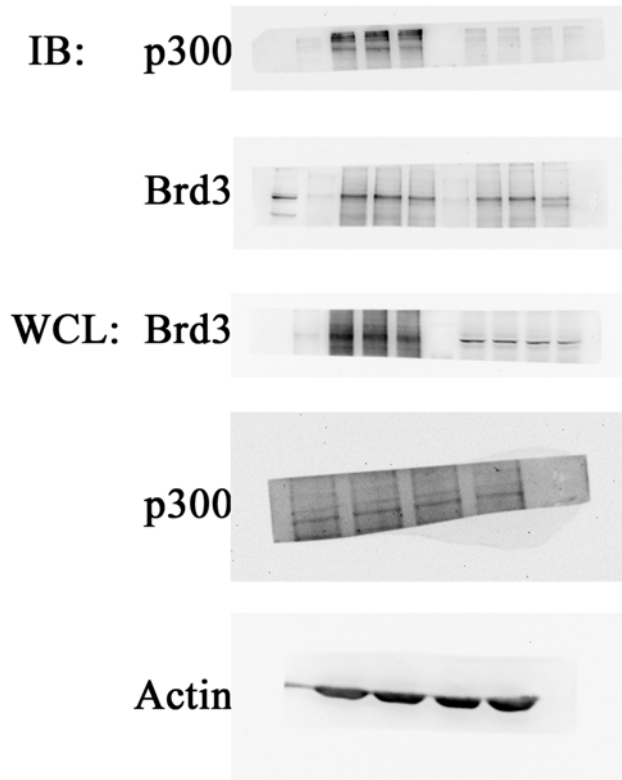

Figure 5b

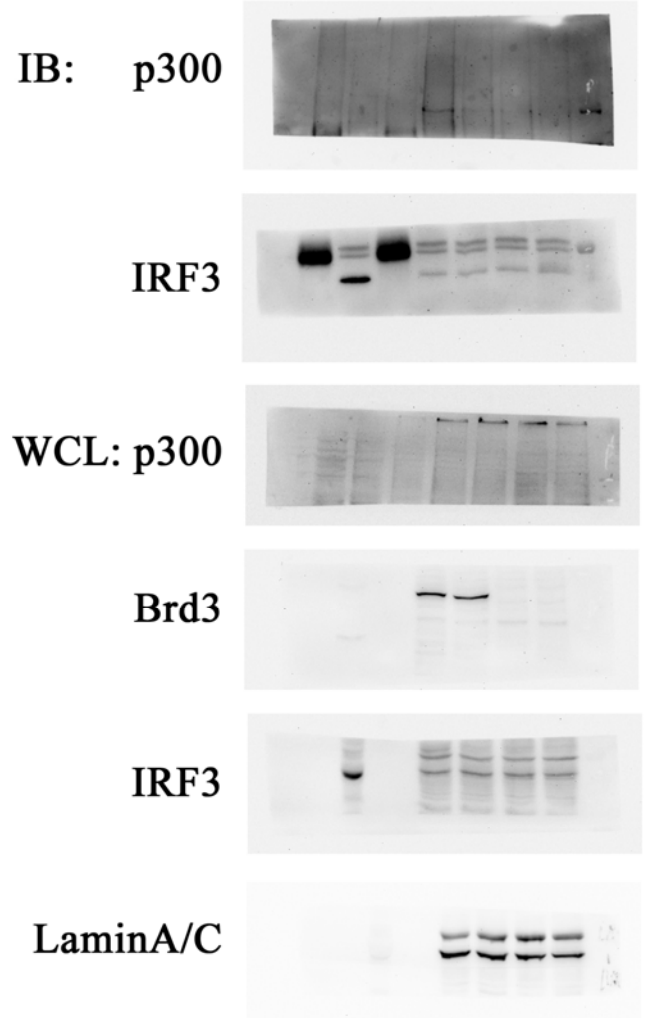

Figure 5c

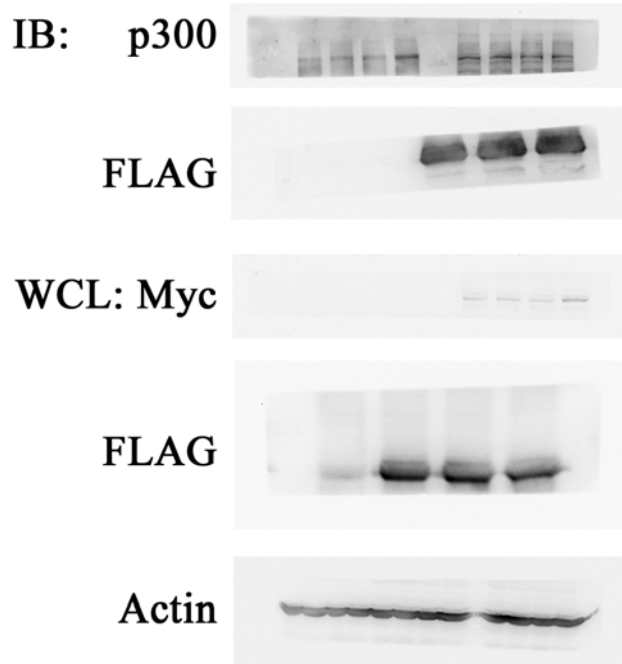

# Uncropped data for supplementary data

S.Fig. 1a

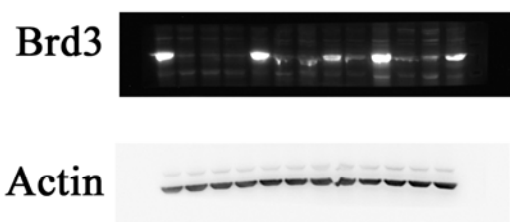

S.Fig. 5

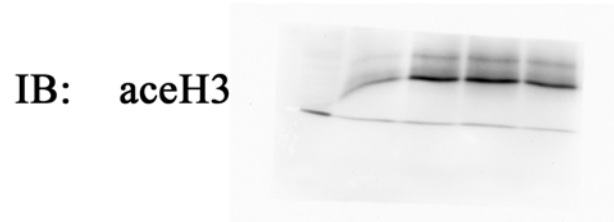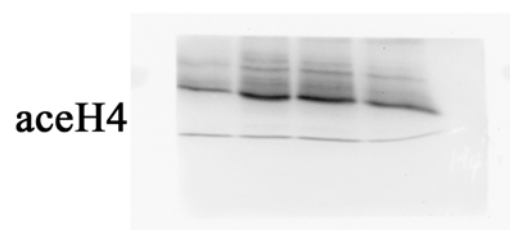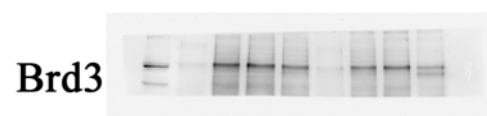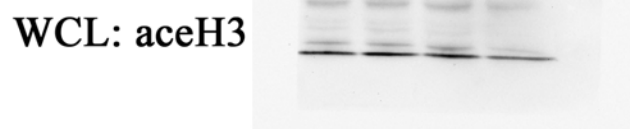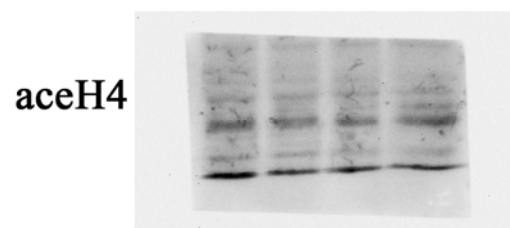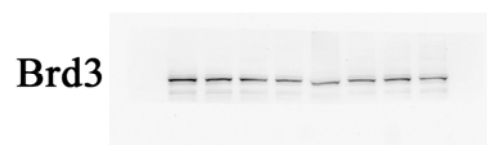

S.Fig. 4

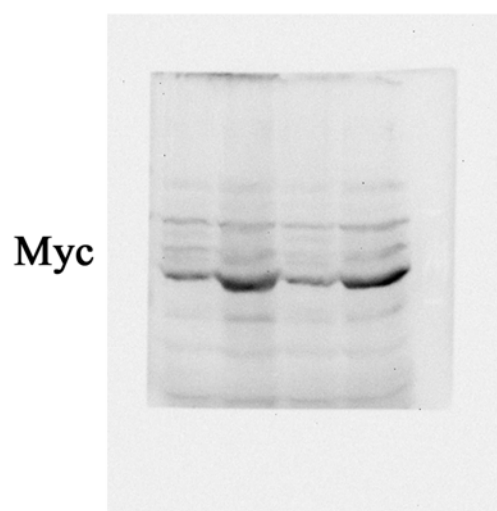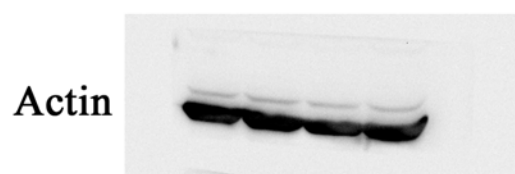

Supplement: 41598_2020_77134_MOESM1_ESM.pdf [file 41598_2020_77134_MOESM1_ESM.pdf]
